# Supplementary material for: Non-Enzymatic Electrochemical Sensing of Malathion Pesticide in Tomato and Apple Samples Based on Gold Nanoparticles-Chitosan-Ionic Liquid Hybrid Nanocomposite
Source: PubMed Central journal article supplement (PMC5876763; doi:10.3390/s18030773), 2018-03-05
Supplement: sensors-18-00773-s001.pdf [file sensors-18-00773-s001.pdf]

# Non-enzymatic electrochemical sensing of malathion pesticide in tomato and apple samples based on gold nanoparticles-chitosan-ionic liquid hybrid nanocomposite

Gulcin Bolat, Serdar Abaci \*

Hacettepe University, Faculty of Science, Department of Chemistry, 06800, Beytepe-Ankara, Turkey;  
e-mails: gbolat@hacettepe.edu.tr; sabaci@hacettepe.edu.tr

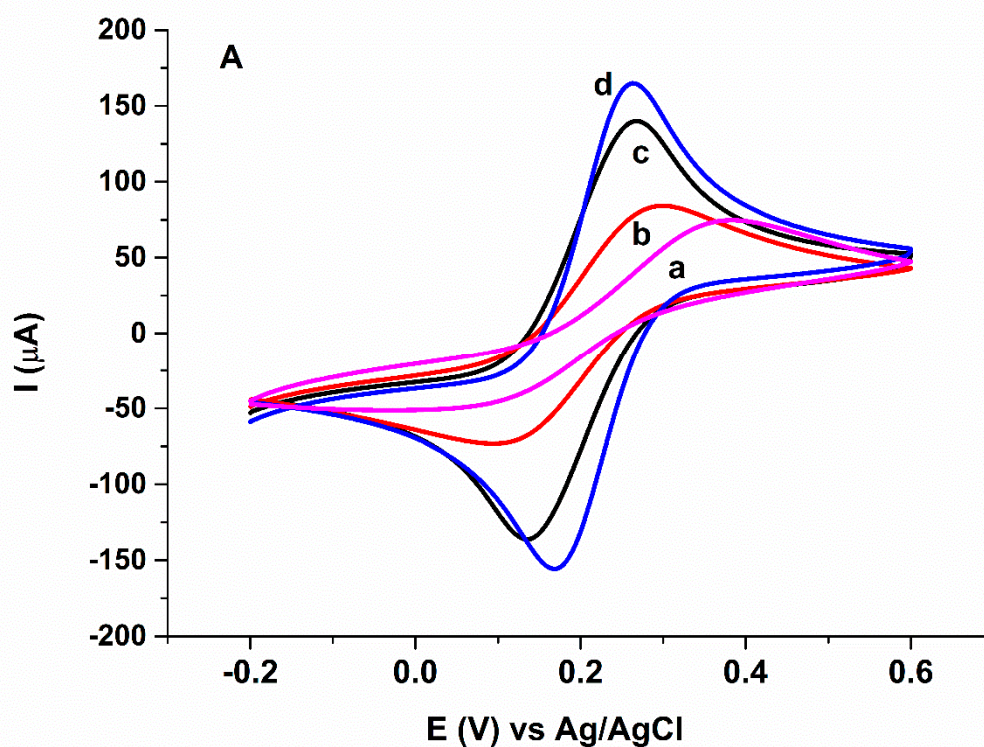

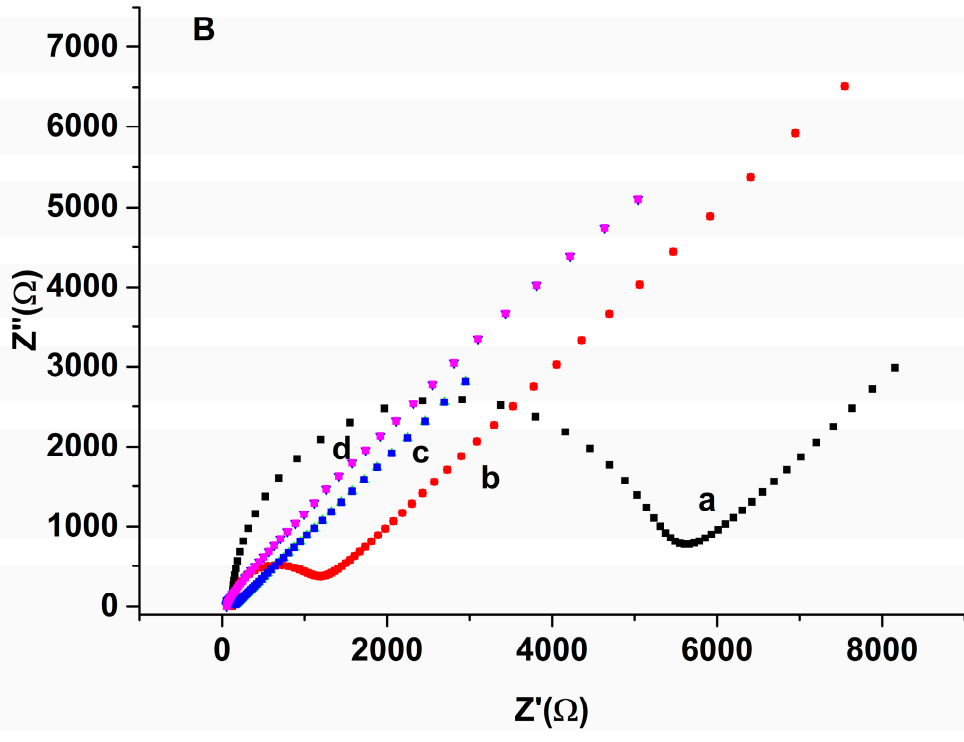

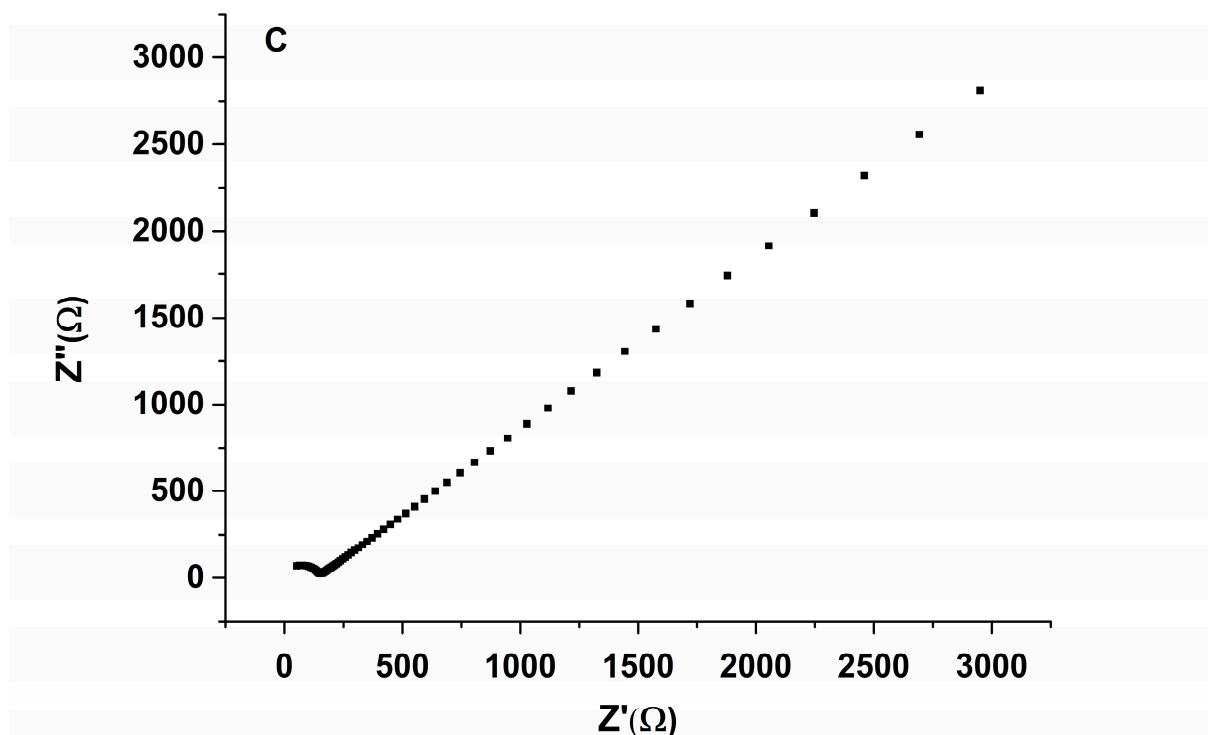

**Figure S1.** (A) CVs of a) Bare PGE b) CS-IL/PGE c) AuNP-CS-IL/PGE d) AuNP/PGE in 0.1 M KCl containing 5.0 mM  $[\text{Fe}(\text{CN})_6]^{3-/4-}$ . Scan rate: 50  $\text{mV s}^{-1}$ . (B) Electrochemical impedance spectroscopy (EIS) of a) Bare PGE, b) CS-IL/PGE, c) AuNP-CS-IL/PGE, d) AuNP/PGE in 0.1 M KCl containing 5.0 mM  $[\text{Fe}(\text{CN})_6]^{3-/4-}$  (C) EIS of AuNP-CS-IL/PGE in 0.1 M KCl containing 5.0 mM  $[\text{Fe}(\text{CN})_6]^{3-/4-}$ , (Frequency range 0.1-100,000 Hz).

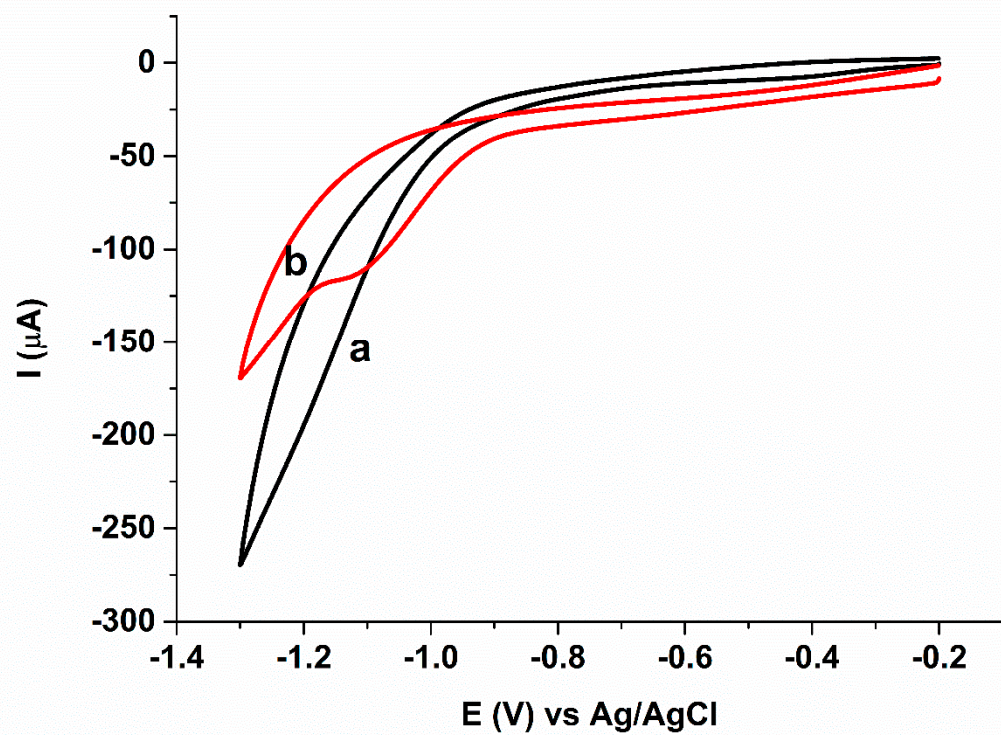

**Figure S2.** AuNP-CS-IL/PGE in pH 7.0 BR containing 20.8 nM MLT a) in the presence of oxygen, b) nitrogen gas purged. Scan rate: 100 mV.s<sup>-1</sup>.
